# Supplementary material for: Excavaciones arqueológicas en Lacipo (Casares, Málaga): campañas de 1975 y 1976
Source: Springer Nature journal article supplement (doi:10.1007/s00204-016-1659-1), 1982-01-01
Supplement: MOESM3 [file 204_2016_1659_MOESM3_ESM.xlsx]

## Sheet: organics
	CB14	ZnO	Wood Comb. PM2	Internal Standard	RSD of the procedure
	mg/kg	mg/kg	mg/kg
PAH
2,2'-Binaphthalene	n. d.	< 0.008	4.92	Chrysene d12	0.0354598
Acenaphthene	0.867	< 0.038	< 0.037	Acenaphthylene d8	0.0214105
Acenaphthylene	0.1	< 0.049	2.59	Acenaphthene d10	0.020522
Acephenanthrylene	< 0.005	< 0.005	8.85	Fluoranthene d10	0.0165655
Anthanthrene	n. d.	< 0.008	0.223	Dibenz[ah]anthracene d14	0.0164969
Anthracene	< 0.024	< 0.024	6.3	Anthracene d10	0.0454997
Benz[a]anthracene	n. d.	< 0.007	23.3	Benz[a]anthracene d12	0.0176933
Benz[a]pyrene	n. d.	< 0.006	18.6	Benz[a]pyrene d12	0.0178753
Benz[e]pyrene	n. d.	< 0.002	23.9	Benz[e]pyrene d12	0.0142032
Benzo[c]phenanthrene	n. d.	< 0.002	9.51	Benz[a]anthracene d12	0.0220426
Benzo[ghi]fluoranthene	n. d.	< 0.007	24.2	Benz[a]anthracene d12	0.0176933
Benzo[ghi]perylene	n. d.	< 0.005	17	Benzo[ghi]perylene d12	0.0225979
Biphenyl	0.116	< 0.005	0.277	Naphthalene d8	0.0436199
Chrysene	n. d.	< 0.007	42.3	Chrysene d12	0.01632
Coronene	n. d.	< 0.01	6.75	Coronene d12	0.0564252
Cyclopenta[cd]pyrene	n. d.	< 0.002	< 0.002	Benz[a]anthracene d12	0.0220426
Dibenz[ah]anthracene	n. d.	< 0.008	1.4	Dibenz[ah]anthracene d14	0.0164969
Fluoranthene	< 0.005	< 0.005	103	Fluoranthene d10	0.0165655
Fluorene	< 0.072	< 0.072	0.929	Fluorene d10	0.0124308
Indeno[1,2,3-cd]pyrene	n. d.	< 0.01	11	Indeno[1,2,3-cd]pyrene d12	0.0236497
Naphthalene	2.75	0.01	0.715	Naphthalene d8	0.0518202
Perylene	n. d.	< 0.002	3.02	Perylene d12	0.013681
Phenanthrene	< 0.018	< 0.018	52.1	Phenanthrene d10	0.0108589
Pyrene	< 0.02	< 0.02	109	Pyrene d10	0.0146018
sum Benzo[b,k]fluoranthene	n. d.	< 0.005	52.2	sum Benzo[b,k]fluoranthene d12	0.0255092
sum PAH MW 302	n. d.	< 0.01	12.37	Coronene d12	0.0564252
Dibenzo[a,e]pyrene	n. d.	< 0.01	2.65	Coronene d12	0.0564252
Dibenzo[a,h]pyrene	n. d.	< 0.01	0.315	Coronene d12	0.0564252
Dibenzo[a,i]pyrene	n. d.	< 0.01	0.655	Coronene d12	0.0564252
Dibenzo[a,l]pyrene	n. d.	< 0.01	2.24	Coronene d12	0.0564252
alkylated PAH
sum Methyl-PAH MW 192	< 0.011	< 0.011	17.1	Phenanthrene d10	0.022133
sum Dimethyl-PAH MW 206	< 0.008	< 0.008	4.33	Phenanthrene d10	0.0194798
sum Methyl-PAH MW 216	< 0.014	< 0.014	21.7	Pyrene d10	0.0269561
4-Methylpyrene	< 0.014	< 0.014	1.88	Pyrene d10	0.0269561
2-Methylpyrene	< 0.014	< 0.014	4.19	Pyrene d10	0.0269561
1-Methylpyrene	< 0.014	< 0.014	5.08	Pyrene d10	0.0269561
sum Methyl-PAH MW 242	n. d.	< 0.005	15	Benz[a]anthracene d12	0.0154646
sum Dimethyl-PAH MW 256	n. d.	< 0.002	9.32	Benz[a]anthracene d12	0.0233099
Retene	< 0.005	< 0.005	31.5	Phenanthrene d10	0.0163524
o-PAH
1,5-Dihydroxynaphthalene	n. d.	< 0.024	< 0.023	Cholesterol d6	0.0334953
1,8-Dihydroxynaphthalene	n. d.	< 0.024	< 0.023	Cholesterol d6	0.0334953
1,8-Naphthalic anhydride	< 0.017	< 0.017	31.1	Fluorene d10	0.140677
11H-Benzo[a]fluoren-11-one	< 0.004	< 0.004	15	Fluoranthene d10	0.0588643
11H-Benzo[b]fluoren-11-one	< 0.003	< 0.003	20	Fluoranthene d10	0.0668772
1H-Phenalen-1-one	< 0.136	< 0.136	39.3	Fluorene d10	0.0293364
1-Hydroxynaphthalene	n. d.	< 0.024	< 0.023	Cholesterol d6	0.0334953
1-Hydroxypyrene	n. d.	< 0.985	< 0.947	Cholesterol d6	0.0426359
2,3-5,6-Dibenzoxalene	< 0.004	< 0.004	7.17	Fluoranthene d10	0.0588643
2-Hydroxynaphthalene	n. d.	< 0.028	< 0.027	Cholesterol d6	0.0416818
3-Hydroxyphenanthrene	n. d.	< 0.024	14.7	Cholesterol d6	0.0334953
4-Hydroxyphenanthrene	n. d.	< 0.131	< 0.126	Cholesterol d6	0.0642277
4-Oxapyrene-5-one	< 0.004	< 0.004	6.98	Fluoranthene d10	0.0588643
5,12-Naphthacenedione	n. d.	< 0.208	1.3	Benz[a]anthracene-7,12-dione d10	0.0482149
6H-Benzo[cd]pyren-6-on	n. d.	< 0.286	31.6	Benz[a]anthracene-7,12-dione d10	0.0361208
7H-Benz[de]anthracen-7-one	< 0.003	< 0.003	24	Fluoranthene d10	0.0668772
7H-Benzo[c]fluorene-7-one	< 0.004	< 0.004	6.6	Fluoranthene d10	0.0588643
9,10-Anthracenedione	< 0.002	< 0.002	29.6	Phenanthrene d10	0.0414844
9H-Fluoren-9-one	< 0.136	< 0.136	18.4	Fluorene d10	0.0293364
9-Hydroxyphenanthrene	n. d.	< 0.048	< 0.046	Cholesterol d6	0.0822158
Benz[a]anthracene-7,12-dione	n. d.	< 0.286	4.49	Benz[a]anthracene-7,12-dione d10	0.0361208
Benzo[b]naphtho[1,2-d]furan	< 0.021	< 0.021	13	Phenanthrene d10	0.0393807
Benzo[b]naphtho[2,3-d]furan	< 0.025	< 0.025	5.54	Phenanthrene d10	0.0402401
Benzo[kl]xanthene	< 0.136	< 0.136	5.29	Fluorene d10	0.0293364
Cyclopenta(def)phenanthrenone	< 0.006	< 0.006	21.9	Phenanthrene d10	0.0431293
Naphtho[2,1,8,7-klmn]xanthene	n. d.	< 1.25	3.5	Benz[a]anthracene-7,12-dione d10	0.0415695
Phenanthro[3,4-c]furan-1,3-dione	n. d.	< 0.286	2.61	Benz[a]anthracene-7,12-dione d10	0.0361208
Xanthone	< 0.008	< 0.008	12.5	Fluorene d10	0.0535979
Resin Acids
6-Dehydrodehydroabietic acid	n. d.	< 0.001	1660	Levoglucosan 13C6	0.0578232
6-Dehydrodehydroabietic acid, methyl ester	< 0.02	< 0.02	< 0.02	Pyrene d10	0.0146018
7-Oxodehydroabietic acid	n. d.	< 0.001	896	Levoglucosan 13C6	0.0578232
7-Oxodehydroabietic acid, methyl ester	n. d.	< 0.001	< 0.001	Pyrene d10	0.0146018
Abietic acid	n. d.	< 0.001	< 0.001	Levoglucosan 13C6	0.0578232
Dehydroabietic acid	n. d.	< 0.001	11350	Levoglucosan 13C6	0.0578232
Dehydroabietic acid, methyl ester	< 0.02	< 0.02	16.8	Pyrene d10	0.0146018
Isopimaric acid	n. d.	< 0.02	50.8	Levoglucosan 13C6	0.0550209
Pimaric acid	n. d.	< 0.02	< 0.019	Levoglucosan 13C6	0.0550209
Alkanes
Dodecane	98.3	< 0.02	< 0.026	Hexadecane d34	0.0309167
Tridecane	24.3	< 0.02	< 0.019	Hexadecane d34	0.0304283
Tetradecane	81.4	3.79	5.11	Hexadecane d34	0.0364002
Pentadecane	8.56	< 0.02	< 0.019	Hexadecane d34	0.028357
Hexadecane	33.8	< 0.025	< 0.024	Hexadecane d34	0.0348349
Heptadecane	10.6	< 0.023	5.99	Hexadecane d34	0.0317836
Octadecane	21.6	< 0.025	< 0.024	Octadecane d38	0.0350963
Nonadecane	2.34	< 0.021	< 0.02	Octadecane d38	0.0299795
Eicosane	< 0.027	< 0.027	< 0.027	Octadecane d38	0.0339532
Heneicosane	< 0.027	< 0.027	< 0.027	Octadecane d38	0.0409309
Docosane	< 0.027	< 0.027	< 0.027	Docosane d46	0.0315639
Tricosane	< 0.027	< 0.027	< 0.027	Docosane d46	0.0296629
Tetracosane	5.71	1.05	8.36	Tetracosane d50	0.0280782
Pentacosane	0.765	< 0.027	6.7	Tetracosane d50	0.0307318
Hexacosane	2.18	< 0.027	6.09	Tetracosane d50	0.0292876
Heptacosane	0.17	< 0.027	7.64	Tetracosane d50	0.0290121
Octacosane	1.45	0.898	7.31	Tetracosane d50	0.0307749
Nonacosane	0.471	0.106	7.09	Tetracosane d50	0.0306226
Triacontane	2.63	0.085	5.12	Triacontane d62	0.0404456
Hentriacontane	1.1	0.255	5.45	Triacontane d62	0.0474143
Dotriacontane	0.774	< 0.036	2.82	Triacontane d62	0.0472119
Tritriacontane	0.432	< 0.036	2.82	Triacontane d62	0.0545748
Tetratriacontane	< 0.036	< 0.036	2.27	Triacontane d62	0.0605425
Pentatriacontane	< 0.031	< 0.031	< 0.029	Triacontane d62	0.0644015
Hexatriacontane	< 0.026	< 0.026	< 0.025	Triacontane d62	0.0652761
Octatriacontane	< 0.022	< 0.022	< 0.021	Triacontane d62	0.077027
Heptatriacontane	< 0.012	< 0.012	< 0.012	Triacontane d62	0.0596266
Nonatriacontane	< 0.01	< 0.01	< 0.009	Triacontane d62	0.0723613
Tetracontane	< 0.008	< 0.008	< 0.008	Triacontane d62	0.0790534
Anhydrous Sugars
Galactosan	n. d.	< 0.183	338	Levoglucosan 13C6	0.0248043
Mannosan	n. d.	< 0.223	1030	Levoglucosan 13C6	0.0335054
Levoglucosan	n. d.	< 1.23	7880	Levoglucosan 13C6	0.0880799
Nitro-Aromats
2,6-Dimethoxy-4-nitrophenol	n. d.	n. d.	570	Vanillin 13C6	0.0452871
4-Nitrocatechol	n. d.	n. d.	< 0.034	Vanillin 13C6	0.0452871
4-Nitrophenol	n. d.	n. d.	26.4	Vanillin 13C6	0.0452871
Nitrocatechol	n. d.	n. d.	60.7	Vanillin 13C6	0.0452871
Lignin degradation products
3-Guaiacylpropanoic acid	n. d.	< 0.011	6.93	Levoglucosan 13C6	0.0479978
3-Guaiacylpropanol	n. d.	< 0.011	52.2	Levoglucosan 13C6	0.0479978
3-Syringylpropanoic acid	n. d.	< 0.011	2.08	Levoglucosan 13C6	0.0479978
4-Guaiacylbutanoic acid	n. d.	< 0.011	6.29	Levoglucosan 13C6	0.0479978
4-Methylcatechol	n. d.	n. d.	21	Vanillin 13C6	0.0452871
4-Methylsyringol	n. d.	n. d.	56.2	Vanillin 13C6	0.0452871
Acetosyringone	n. d.	< 0.002	293	Levoglucosan 13C6	0.0473305
Homosyringic acid	n. d.	< 0.011	5.58	Levoglucosan 13C6	0.0479978
Homovanillic acid	n. d.	< 0.011	3.82	Levoglucosan 13C6	0.0479978
Methylvanillat	n. d.	< 0.008	19.9	Levoglucosan 13C6	0.0313324
m-Hydroxybenzoic acid	n. d.	< 0.011	85.8	Levoglucosan 13C6	0.0479978
p-Hydroxybenzoic acid	n. d.	< 0.011	89.6	Levoglucosan 13C6	0.0479978
Propionylguaiacol	n. d.	< 0.002	24	Levoglucosan 13C6	0.0473305
Salicylic acid	n. d.	< 0.011	28.6	Levoglucosan 13C6	0.0479978
Sinapylalcohol	n. d.	< 0.005	1.77	Levoglucosan 13C6	0.066466
Sinapylaldehyde	n. d.	< 0.005	13.6	Levoglucosan 13C6	0.066466
Syringaldehyde	n. d.	< 0	3350	Levoglucosan 13C6	0.0488769
Syringic acid	n. d.	< 0.005	251	Levoglucosan 13C6	0.066466
Syringic acid, methyl ester	n. d.	< 0.008	33	Levoglucosan 13C6	0.0313324
Syringylaceton	n. d.	< 0.005	9.6	Levoglucosan 13C6	0.066466
Syringylpropene	n. d.	< 0.008	12.8	Levoglucosan 13C6	0.0313324
Vanillic acid	n. d.	< 0.011	179	Levoglucosan 13C6	0.0479978
Vanillin	n. d.	n. d.	323	Vanillin 13C6	0.0452871
3,3',5,5'-Tetramethoxy-4,4'-dihydroxystilbene	n. d.	< 0.028	< 0.027	Cholesterol d6	0.0416818
3,3',5-Trimethoxy-4,4'-dihydroxystilbene	n. d.	< 0.028	< 0.027	Cholesterol d6	0.0416818
3,3'-Dimethoxy-4,4'-dihydroxystilbene	n. d.	< 0.028	< 0.027	Cholesterol d6	0.0416818
3,5-Dimethoxy-4,4'-dihydroxystilbene	n. d.	< 0.028	47.4	Cholesterol d6	0.0416818
Disyringyl	n. d.	< 0.002	142	Levoglucosan 13C6	0.0473305
Disyringylmethane	n. d.	< 0.028	11.4	Cholesterol d6	0.0416818
Disyringylpropane	n. d.	< 0.002	< 0.002	Levoglucosan 13C6	0.0473305
Divanillyl	n. d.	< 0.008	133	Levoglucosan 13C6	0.0313324
Guaiacylsyringylmethane	n. d.	< 0.028	< 0.027	Cholesterol d6	0.0416818
Matairesinol	n. d.	< 0.028	< 0.027	Cholesterol d6	0.0416818
Shonanin	n. d.	< 0.028	138	Cholesterol d6	0.0416818
Vanillylmandelic acid	n. d.	< 0.011	< 0.011	Levoglucosan 13C6	0.0479978
Vanillylsyringyl	n. d.	< 0.002	52	Levoglucosan 13C6	0.0473305
Acids
Tridecanoic acid	n. d.	< 73.1	< 70.3	Palmitic acid d31	0.0756814
Tetradecanoic acid	n. d.	< 73.1	< 70.3	Palmitic acid d31	0.0756814
n-Pentadecanoic acid	n. d.	< 73.1	< 70.3	Palmitic acid d31	0.0756814
Palmitic acid	n. d.	3680	29	Palmitic acid d31	0.0756814
Oleic acid	n. d.	< 73.1	< 70.3	Palmitic acid d31	0.0756814
Stearic acid	n. d.	1920	< 233	Palmitic acid d31	0.0228049
