# Supplementary material for: Excavaciones arqueológicas en Lacipo (Casares, Málaga): campañas de 1975 y 1976
Source: Springer Nature journal article supplement (doi:10.1007/s00204-016-1659-1), 1982-01-01
Supplement: MOESM4 [file 204_2016_1659_MOESM4_ESM.xlsx]

## Sheet: Tabelle1
EC/OC (Gauggel 2012)		concentration [%]
elemental carbon (EC)		18
organic carbon (OC)		6.7
metals (Gauggel 2013)		concentration [mg/kg]
K		69363.5
As		0.0037
Cd		87.2
Cr		3.4
Cu		4.1
Ni		0.5
Pb		1462.6
Mn		2138
Zn		4178.8
Al		n.a.
Fe		114917
ions (Gauggel 2013)		concentration [mg/kg]
Fluoride		0.96
Chloride		42.4
Nitrite		0.004
Nitrate		1.08
Phosphate		0.004
Sulfate		151.6
