# Supplementary figures and images for: Excavaciones arqueológicas en Lacipo (Casares, Málaga): campañas de 1975 y 1976
Source: Springer Nature journal article supplement (doi:10.1007/s00204-016-1659-1), 1982-01-01

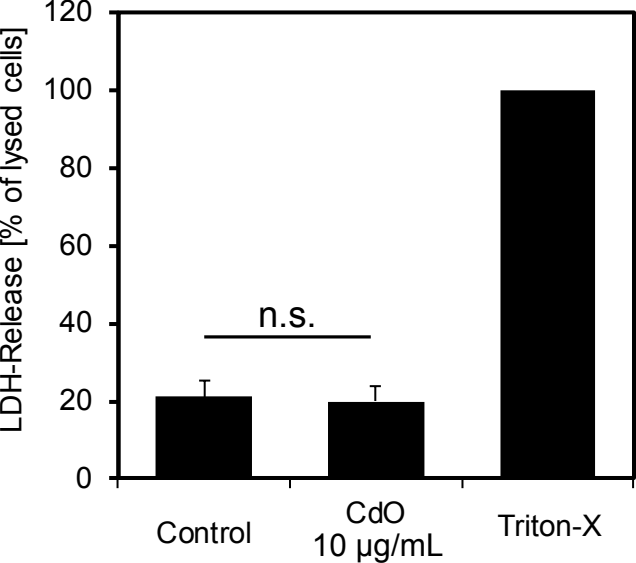

Supplement: MOESM1 [file 204_2016_1659_MOESM1_ESM.pdf › 204_2016_1659_MOESM1_ESM.pdf]

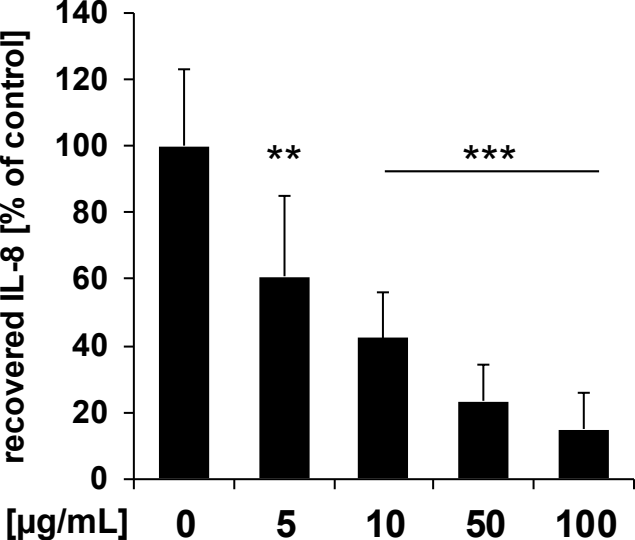

Supplement: MOESM2 [file 204_2016_1659_MOESM2_ESM.pdf › 204_2016_1659_MOESM2_ESM.pdf]
